# Supplementary material
Source: PubMed Central journal article supplement (PMC4583079)
Supplement: supp_M060244_jlr.M060244-1.pdf [file supp_M060244_jlr.M060244-1.pdf]

## Supplemental Materials and Results

### Supplementary Figures and Legends

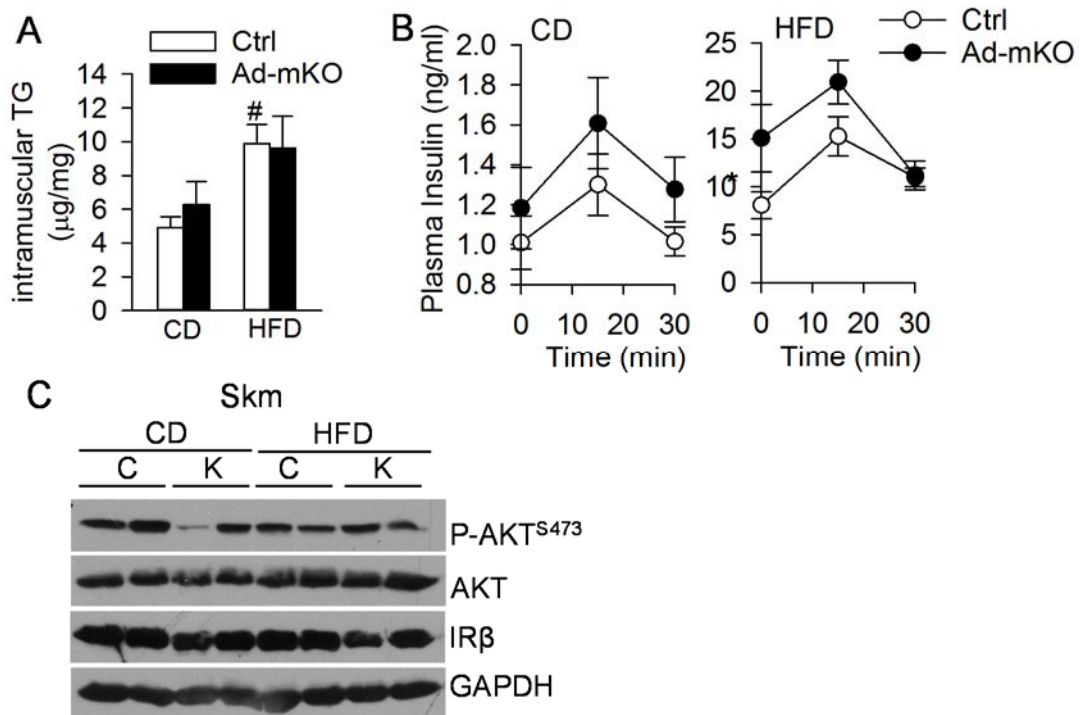

### Supplementary Figure 1. Metabolic parameters in Ad-mKO mice

A. TG content in skeletal muscle of Ctrl and Ad-mKO mice on chow diet (CD) and high fat diet (HFD) as normalized to the tissue weight. B. Plasma insulin levels at 0, 15 and 30 m during GTT in Ctrl and Ad-mKO mice fed with CD and HFD. n=6-8/group. C. Basal insulin signaling in skeletal muscle (SkM) of Ctrl (C) and Ad-mKO (K) mice on CD and HFD after 4 h fast. Representative western blot from 2 different cohorts (n=4 total). \*: p < 0.05 vs Ctrl mice. #: p < 0.05 vs CD.

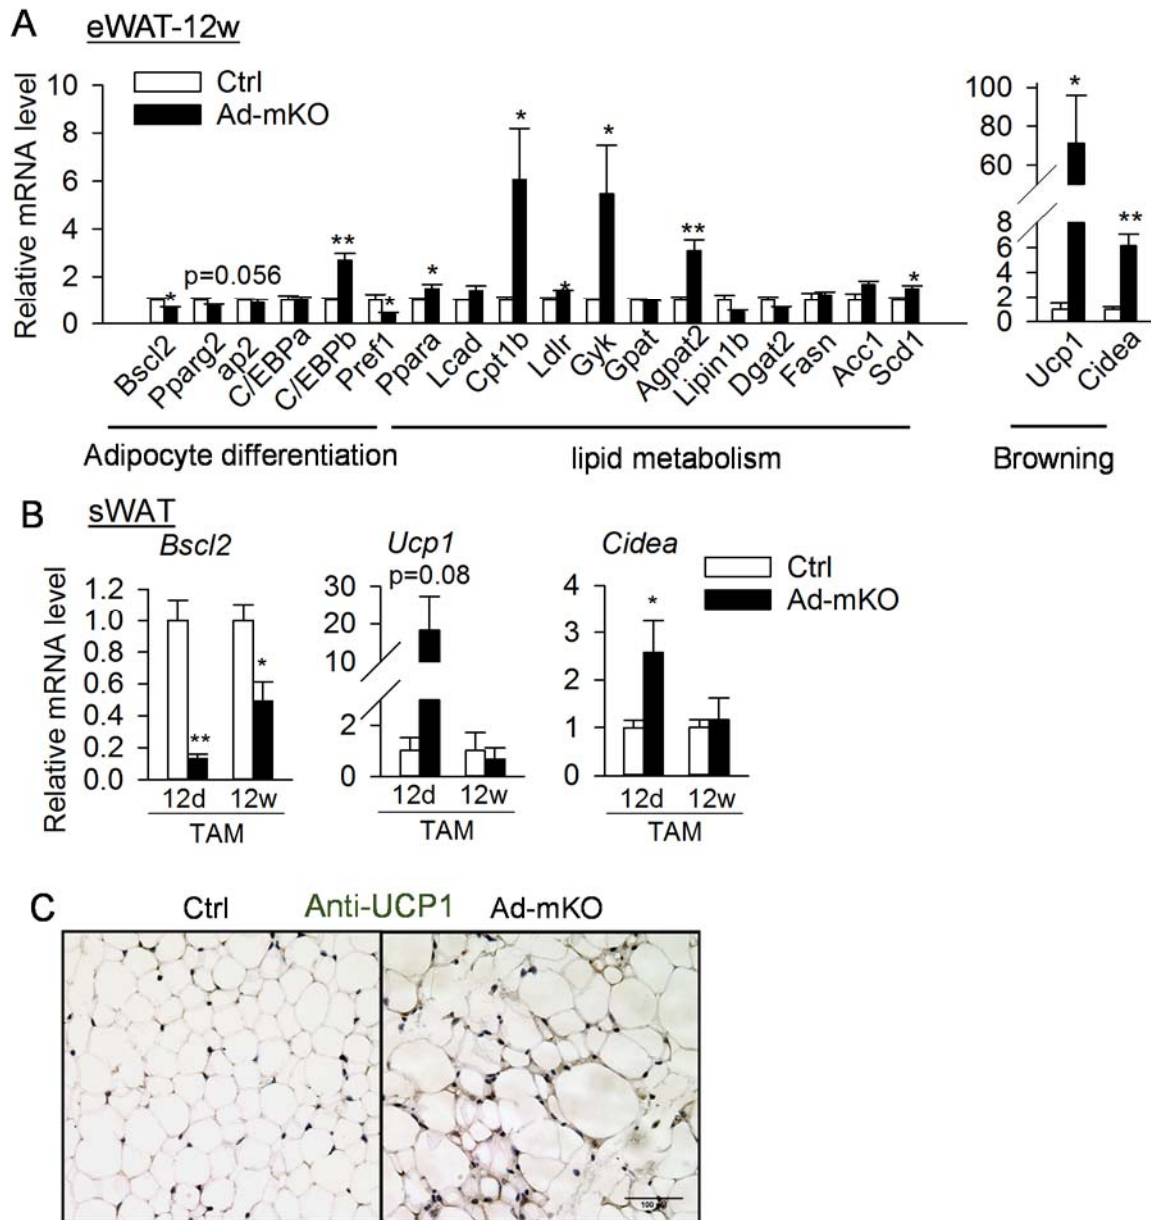

**Supplementary Figure 2. Deletion of *Bsc12* in mature adipose tissue induces browning**

A. RT-PCR analysis of genes involved in browning and lipid metabolism in eWAT of Ctrl and Ad-mKO mice

12w after TAM treatment (n=6/group). B. RT-PCR analysis of *Bsc12*, *Ucp1* and *Cidea* in sWAT of Ctrl and Ad-

mKO mice 12d and 12w after TAM treatment (n=6/group). C. Immunohistochemical staining of UCP1 in sWAT

of Ctrl and Ad-mKO mice 12d after TAM treatment (n=3). Scale bar = 100  $\mu$ M. \*:  $p < 0.05$ ; \*\*:  $p < 0.005$ .

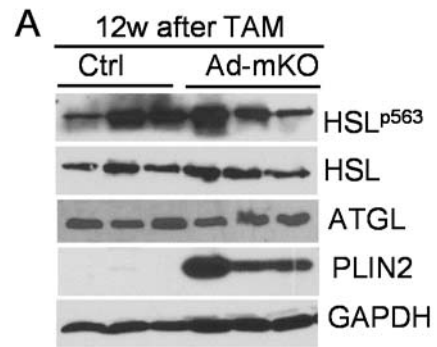

**Supplementary Figure 3. PKA signaling in Ad-mKO mice 12w after TAM treatment**

A. Western blot analysis of PKA mediated signaling in eWAT of Ctrl and Ad-mKO mice 12w after TAM treatment (n=3). Representative data are from 3 independent cohorts.

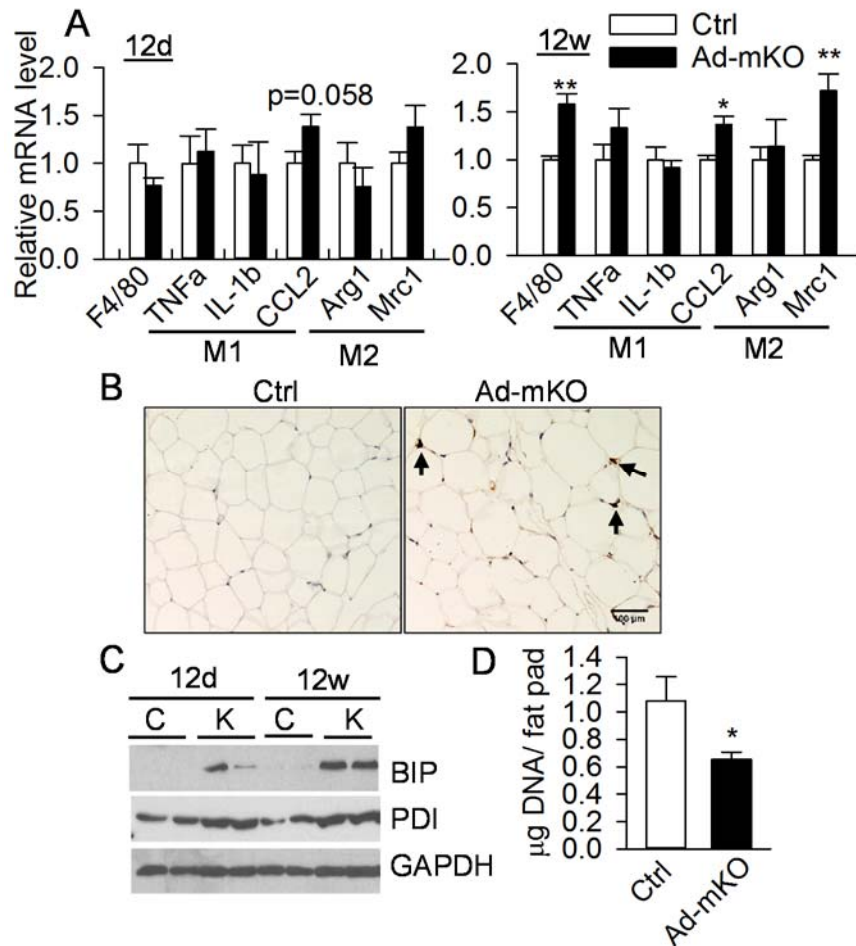

**Supplementary Figure 4. Inflammation and ER stress in adipose tissue of Ad-mKO mice.**

A. RT-PCR analysis of macrophage marker gene expression in eWAT of Ctrl and Ad-mKO mice 12d and 12w after TAM treatment (n=6/group). B. Representative immunohistochemical images of infiltrated macrophages stained with F4/80 (dark brown, arrow indicated) and counter-stained with hematoxylin in eWAT of Ctrl and Ad-mKO mice 12w after TAM treatment (n=3). Scale bar = 100 μm. C. Representative western blot of ER stress marker protein expression in eWAT of Ctrl and Ad-mKO mice 12d and 12w after TAM treatment (n=6 total/group). D. Total DNA content per eWAT fat pads of Ctrl and Ad-mKO mice 12w after TAM treatment (n=8/group). \* p < 0.05; \*\*: p < 0.005.

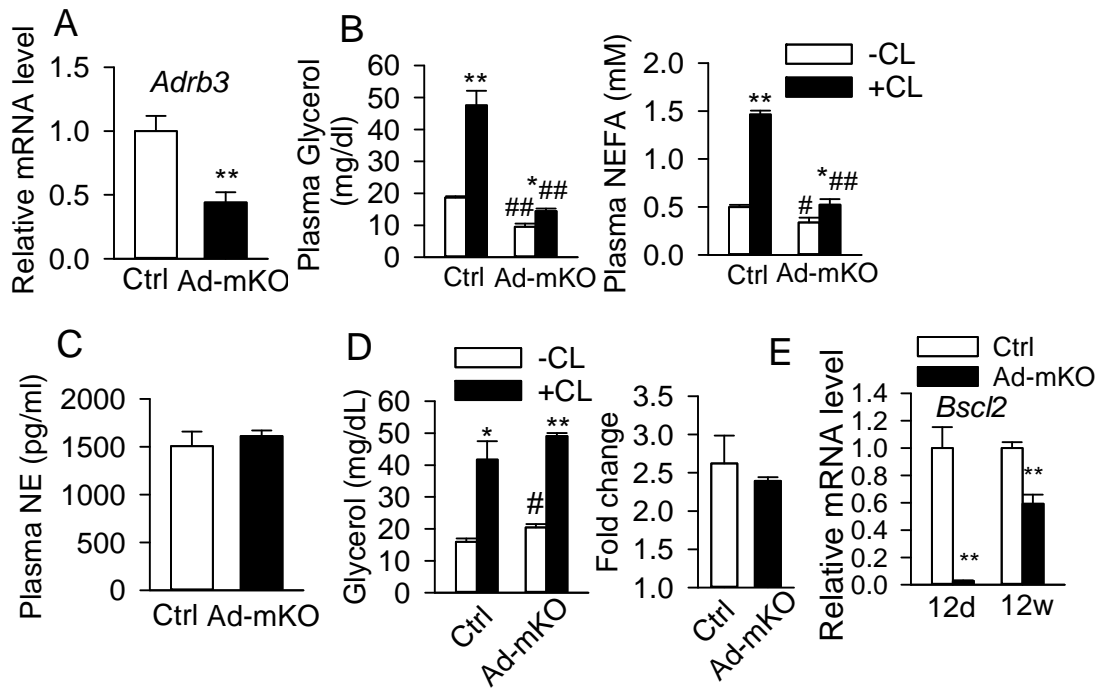

### Supplementary Figure 5. Downregulation of ADRB3 signaling in Ad-mKO mice

A. mRNA expression of *Adrb3* in eWAT. B. Plasma NEFA and glycerol in vehicle (-CL) and CL316,243 (+CL) treated Ctrl and Ad-mKO mice (n=6/group). C. Plasma norepinephrine (NE) levels in Ctrl and Ad-mKO mice (n=7/group). D. Vehicle (-CL) and CL316,243 (+CL) stimulated glycerol release (and fold changes) in isolated adipocytes ( $1.5 \times 10^5$ /sample) pooled from at least 4 Ctrl and Ad-mKO mice. All experiments (A-D) were performed in mice 12w after TAM treatment. E. *Bsc12* mRNA expression in isolated adipocytes from eWAT of Ctrl and Ad-mKO mice 12d and 12w after TAM injection (n=4). \*:  $p < 0.05$ , \*\*:  $p < 0.005$  vs Ctrl; #:  $p < 0.05$  vs -CL within the same genotype.

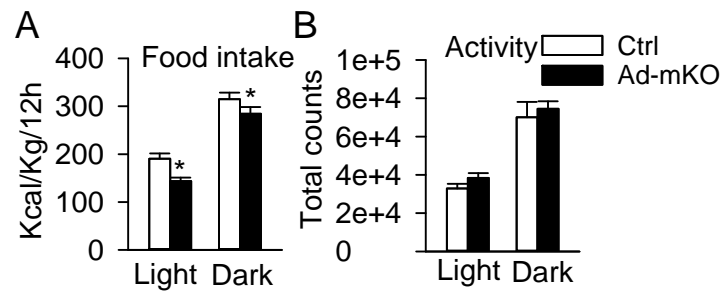

**Supplementary Figure 6. Metabolic homeostasis in Ad-mKO mice**

A. Food intake as normalized to body weight. B. Activity in Ctrl and Ad-mKO mice 3w after TAM treatment

(n=8/group). \*:  $p < 0.05$  vs Ctrl.

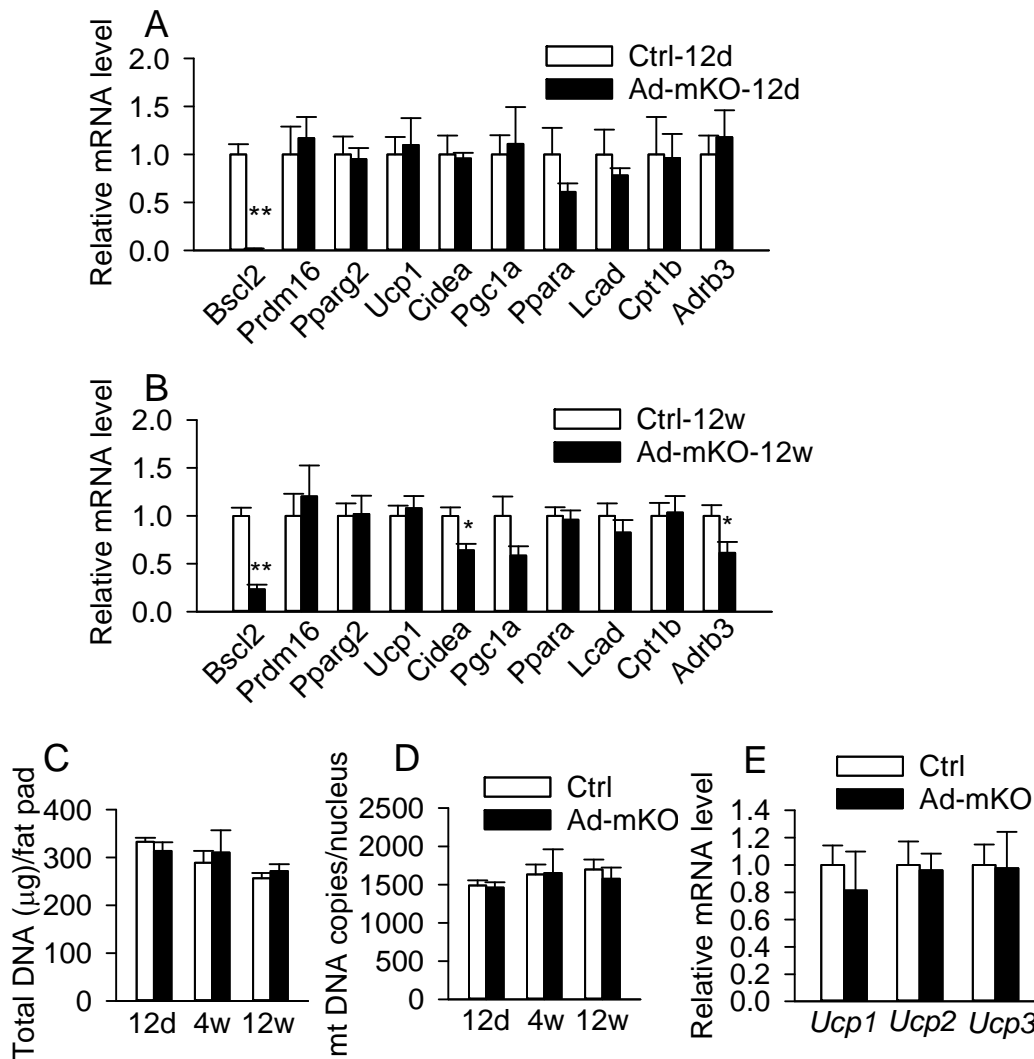

**Supplementary Figure 7. Effect of Bsc12 deletion on BAT and expression of *Ucp* in skeletal muscle**

A-B. RT-PCR analysis of gene expression in BAT of 4 h fasted Ctrl and Ad-mKO mice (A) 12d and 12w (B) after TAM administration. n=6/group. C. Total DNA content as normalized per BAT fat pad. D. Mitochondrial DNA copies in Ctrl and Ad-mKO BAT 12d, 4w and 12w after TAM administration. n=8/group. E. RT-PCR analysis of *Ucp* gene expression in skeletal muscle of 4 h fasted Ctrl and Ad-mKO mice 12w after TAM induced Bsc12 deletion (n=6). . \*: P < 0.05; \*\*: p < 0.005.

**Supplementary Table 1.** Differentially expressed genes (207) in eWAT from Ctrl and Ad-mKO mice 12d after TAM treatment with fold changes greater than 2 ( $1 < \text{Log}_2 < -1$ ), adjusted p value  $< 0.05$  (n=3 for each group pooled from 9 animals).

| Gene ID       | Ctrl     | Ad-mKO   | log2FoldChange | Padj     |
|---------------|----------|----------|----------------|----------|
| Ehhadh        | 3941.644 | 14991.08 | 1.927235       | 4.20E-52 |
| Hist1h1c      | 2726.221 | 8669.358 | 1.669022       | 2.01E-38 |
| Cpt1b         | 376.9612 | 1778.836 | 2.238445       | 2.30E-36 |
| Pdk4          | 5309.677 | 22361.46 | 2.074319       | 1.30E-28 |
| Fgf21         | 6.879906 | 377.1254 | 5.776512       | 7.25E-24 |
| Trim66        | 86.64461 | 390.8385 | 2.173391       | 3.77E-21 |
| 3930402G23Rik | 28.9573  | 217.7902 | 2.91094        | 6.09E-21 |
| Bscl2         | 19269.78 | 4693.13  | -2.03772       | 8.77E-21 |
| Mthfd2        | 503.562  | 2229.842 | 2.146701       | 4.64E-19 |
| Insig1        | 5523.649 | 32675.2  | 2.564502       | 4.44E-18 |
| S100g         | 1.355806 | 307.9922 | 7.8276         | 3.27E-16 |
| Trub2         | 1580.379 | 3469.414 | 1.134422       | 5.00E-16 |
| Hsd17b12      | 9815.134 | 26207.53 | 1.416902       | 5.21E-16 |
| Col27a1       | 519.2732 | 1666.69  | 1.68242        | 7.23E-16 |
| Gramd1b       | 3461.892 | 7173.466 | 1.05111        | 4.62E-15 |
| Pde4d         | 461.2463 | 1110.768 | 1.267949       | 2.23E-14 |
| Hist1h1d      | 15.23098 | 150.3814 | 3.303545       | 8.84E-14 |
| Egln3         | 285.0828 | 721.5794 | 1.339777       | 2.05E-13 |
| Kcnk3         | 1131.503 | 4751.889 | 2.07026        | 4.58E-13 |
| Apoc4         | 8.998776 | 98.09035 | 3.446311       | 7.29E-13 |
| Chrna2        | 354.5383 | 892.559  | 1.332006       | 1.10E-12 |
| Nnat          | 61927.27 | 22297.9  | -1.47367       | 1.39E-12 |
| Elovl3        | 3.22253  | 120.9629 | 5.230227       | 4.36E-12 |
| Rab44         | 65.23686 | 372.0352 | 2.51168        | 1.72E-11 |
| Ucp3          | 778.2832 | 2350.723 | 1.594737       | 4.88E-11 |
| Cox8b         | 511.2705 | 2123.228 | 2.054101       | 6.92E-11 |
| Peg3          | 5921.158 | 14392.14 | 1.28133        | 7.70E-11 |
| Phospho1      | 553.9861 | 3214.664 | 2.536746       | 1.62E-10 |
| Slc25a33      | 688.4555 | 1389.225 | 1.012845       | 2.06E-10 |
| Prtn3         | 2387.354 | 826.7404 | -1.52991       | 2.53E-10 |
| Gale          | 1593.41  | 4373.011 | 1.456509       | 2.95E-10 |
| Fabp3         | 48.61786 | 909.6751 | 4.225793       | 9.74E-10 |
| Krt36         | 14.56217 | 98.427   | 2.756829       | 1.68E-09 |
| Podn          | 14958.11 | 7255.354 | -1.04381       | 1.76E-09 |
| Klb           | 2081.5   | 4272.249 | 1.037372       | 3.23E-09 |
| Abi3          | 963.6945 | 3118.764 | 1.694327       | 1.36E-08 |
| Acaa1b        | 3202.176 | 9366.256 | 1.54842        | 1.36E-08 |



|             |          |          |          |          |
|-------------|----------|----------|----------|----------|
| Rfc4        | 339.3389 | 702.8813 | 1.050554 | 1.95E-08 |
| Slc16a1     | 2639.729 | 5881.788 | 1.155865 | 2.75E-08 |
| Echdc1      | 8249.836 | 16527.25 | 1.00241  | 6.50E-08 |
| Npas2       | 129.8561 | 442.2466 | 1.767937 | 6.66E-08 |
| Eepd1       | 22952.09 | 11083.11 | -1.05026 | 6.92E-08 |
| Slc25a34    | 111.7264 | 493.2207 | 2.142263 | 7.09E-08 |
| Fabp5       | 6318.851 | 15347.86 | 1.280303 | 9.65E-08 |
| Cela1       | 555.7026 | 1503.082 | 1.435539 | 9.95E-08 |
| Gm6736      | 44.94806 | 155.678  | 1.792234 | 1.43E-07 |
| Ubd         | 222.9494 | 930.3854 | 2.061112 | 1.72E-07 |
| Adam12      | 2685.897 | 5432.161 | 1.016122 | 2.01E-07 |
| Cidea       | 113.8433 | 828.1256 | 2.862801 | 3.35E-07 |
| H2-Q10      | 1320.974 | 4013.81  | 1.60337  | 3.55E-07 |
| Ntrk3       | 383.5396 | 173.9309 | -1.14086 | 4.4E-07  |
| Prodh       | 6857.964 | 3417.377 | -1.00489 | 6.27E-07 |
| Adam2       | 13.3924  | 86.42124 | 2.689971 | 6.64E-07 |
| Ptgfr       | 181.1555 | 391.3983 | 1.111409 | 8.07E-07 |
| Tuba4a      | 1285.247 | 3067.097 | 1.254828 | 8.72E-07 |
| Apoc2       | 125.3082 | 291.1769 | 1.216415 | 2.00E-06 |
| Asf1b       | 130.1773 | 299.0542 | 1.199929 | 2.00E-06 |
| Chchd10     | 2874.369 | 14403.08 | 2.325061 | 2.61E-06 |
| P2rx3       | 96.10392 | 238.1324 | 1.309097 | 3.06E-06 |
| Tuba8       | 52.67943 | 176.0547 | 1.740712 | 3.41E-06 |
| Nfil3       | 253.668  | 655.3646 | 1.369356 | 3.66E-06 |
| Hspa9       | 31674.52 | 67676.46 | 1.095331 | 3.84E-06 |
| Gpnmb       | 994.7696 | 2545.943 | 1.355766 | 5.54E-06 |
| Cox6a2      | 0.64318  | 143.9634 | 7.806263 | 6.20E-06 |
| P2rx5       | 148.197  | 1108.245 | 2.902689 | 7.07E-06 |
| Gm13086     | 290.2755 | 650.2943 | 1.16367  | 1.16E-05 |
| Rprml       | 692.1812 | 249.2402 | -1.47361 | 1.16E-05 |
| Ucp1        | 2.049425 | 462.1121 | 7.81688  | 1.55E-05 |
| Hist2h3c2   | 23.85773 | 92.58027 | 1.956248 | 1.55E-05 |
| Dennd2d     | 5794.651 | 2718.857 | -1.09172 | 1.76E-05 |
| Arf4        | 11826.03 | 23777.24 | 1.007615 | 1.86E-05 |
| Nr4a3       | 143.0352 | 533.4734 | 1.899046 | 1.88E-05 |
| Gdf15       | 59.48876 | 309.9855 | 2.381512 | 1.94E-05 |
| Cyp51       | 3006.036 | 6863.522 | 1.191087 | 2.21E-05 |
| Krt79       | 147.0228 | 881.6171 | 2.584113 | 2.36E-05 |
| Tectb       | 22.60403 | 88.52462 | 1.969499 | 2.38E-05 |
| Unc5c       | 76.1421  | 17.93748 | -2.08572 | 2.38E-05 |
| Hist2h3c1.1 | 177.5004 | 412.5956 | 1.216906 | 2.79E-05 |
| Idi1        | 391.2764 | 789.0485 | 1.011926 | 2.82E-05 |
| Peg10       | 317.552  | 835.6876 | 1.395971 | 3.10E-05 |
| Heph11      | 32.29716 | 190.291  | 2.558728 | 3.31E-05 |
| Cacna1e     | 204.7223 | 67.12171 | -1.60882 | 3.31E-05 |

|                 |          |          |          |          |
|-----------------|----------|----------|----------|----------|
| 6430571L13Rik   | 13.35306 | 66.06967 | 2.306818 | 3.47E-05 |
| Dnmt3l          | 17.08322 | 248.2391 | 3.861079 | 3.82E-05 |
| Gm16194         | 2.390021 | 37.27306 | 3.963038 | 3.90E-05 |
| Olr1            | 13.33744 | 97.16653 | 2.864977 | 4.99E-05 |
| Gm11398         | 137.0512 | 338.9772 | 1.306473 | 6.82E-05 |
| Pon1            | 451.154  | 204.4702 | -1.14173 | 7.48E-05 |
| Ltc4s           | 3207.354 | 6770.285 | 1.077833 | 8.17E-05 |
| B630019A10Rik   | 28.29511 | 96.05772 | 1.763349 | 8.90E-05 |
| Mvd             | 498.3036 | 1213.99  | 1.28466  | 8.99E-05 |
| Aqp2            | 150.5124 | 58.63852 | -1.35996 | 8.99E-05 |
| Gc              | 0.32159  | 24.9937  | 6.280198 | 9.04E-05 |
| Mir686          | 581.1798 | 1246.849 | 1.101231 | 9.11E-05 |
| Parm1           | 1682.171 | 4525.676 | 1.427809 | 9.29E-05 |
| AL672259.1      | 2506.771 | 906.7263 | -1.46709 | 0.000108 |
| Pigr            | 42.57955 | 120.0081 | 1.494899 | 0.000127 |
| Cend1           | 12.57433 | 60.27093 | 2.260981 | 0.00015  |
| Arhgef37        | 316.2468 | 1515.363 | 2.260541 | 0.000154 |
| Nap1l5          | 77.36643 | 177.7325 | 1.199928 | 0.000176 |
| Gm3571          | 28.30169 | 136.058  | 2.265261 | 0.000186 |
| Orm2            | 87.12762 | 314.9264 | 1.853813 | 0.000237 |
| Ece2            | 193.9658 | 543.7025 | 1.487015 | 0.000261 |
| Gyk             | 2362.862 | 5508.483 | 1.22112  | 0.000338 |
| 4930483K19Rik   | 119.9268 | 333.7431 | 1.476584 | 0.000349 |
| Lss             | 2178.709 | 5478.708 | 1.330362 | 0.000351 |
| Nme1            | 3053.019 | 6229.691 | 1.028924 | 0.000358 |
| RP23-455J20.1.1 | 50.34982 | 139.5501 | 1.470724 | 0.000458 |
| Akr1cl          | 1899.548 | 698.8713 | -1.44256 | 0.000494 |
| Cyp2b10         | 61.54506 | 147.3385 | 1.25942  | 0.000503 |
| Pla2g2e         | 183.3458 | 1623.324 | 3.146312 | 0.000534 |
| Scd2            | 12794.33 | 47695.81 | 1.898358 | 0.000623 |
| Gm13068         | 154.8857 | 319.6485 | 1.045282 | 0.00067  |
| Dio2            | 56.12272 | 143.3419 | 1.352803 | 0.000719 |
| Slc41a2         | 364.3607 | 787.2549 | 1.111463 | 0.000789 |
| Slc18a1         | 36.03562 | 119.4628 | 1.729066 | 0.000873 |
| Tnfrsf23        | 156.1406 | 513.2624 | 1.716851 | 0.000951 |
| Dok7            | 276.795  | 130.4497 | -1.08532 | 0.000985 |
| 2010003K11Rik   | 371.6915 | 1001.61  | 1.430144 | 0.001024 |
| Gm16641         | 1571.036 | 3165.136 | 1.010551 | 0.001026 |
| Htra4           | 470.9288 | 190.8538 | -1.30304 | 0.001039 |
| Sc4mol          | 1429.526 | 2986.918 | 1.06312  | 0.001082 |
| Gas6            | 64728.52 | 30737.08 | -1.07442 | 0.001128 |
| Fdps            | 1496.386 | 7414.769 | 2.308919 | 0.001218 |
| 4930528F23Rik   | 30.16636 | 103.3963 | 1.777172 | 0.001228 |
| Golga7b         | 39.2164  | 104.8314 | 1.418542 | 0.001236 |
| Psmb5           | 4564.164 | 9684.213 | 1.085284 | 0.001285 |

|                |          |          |          |          |
|----------------|----------|----------|----------|----------|
| Ppp1r3g        | 2.788914 | 27.33991 | 3.293233 | 0.001509 |
| Cdkn1a         | 1002.035 | 4713.441 | 2.233847 | 0.001526 |
| Hist2h3c1      | 256.5441 | 585.7895 | 1.191176 | 0.001613 |
| Hsd17b7        | 594.5006 | 1228.373 | 1.046999 | 0.001622 |
| 4930578M01Rik  | 165.2684 | 80.91358 | -1.03036 | 0.001767 |
| Gm17147        | 14.10827 | 55.10749 | 1.965708 | 0.001843 |
| Mir5114        | 195.3508 | 767.1072 | 1.973361 | 0.001918 |
| Trim29         | 109.9772 | 286.5746 | 1.381707 | 0.00194  |
| Ighv1-55       | 68.09941 | 9.810783 | -2.7952  | 0.001943 |
| Igsf21         | 40.94881 | 128.1998 | 1.646501 | 0.002217 |
| 2010016I18Rik  | 3972.3   | 1761.818 | -1.17291 | 0.002217 |
| Plin2          | 13704.89 | 71526.39 | 2.383785 | 0.002265 |
| Ccdc18         | 32.16422 | 105.017  | 1.707094 | 0.002287 |
| Hpd1           | 38.21485 | 178.7654 | 2.225862 | 0.002739 |
| Col11a2        | 60.99166 | 135.2248 | 1.148676 | 0.002836 |
| Cstb           | 3011.541 | 6801.449 | 1.17534  | 0.003198 |
| Adam7          | 5.377402 | 6213.606 | 10.17431 | 0.003781 |
| Lrp8           | 72.11388 | 281.5189 | 1.964883 | 0.003821 |
| Nmnat2         | 135.8012 | 62.61326 | -1.11696 | 0.004385 |
| Cxcl13         | 453.2956 | 168.1609 | -1.43061 | 0.004542 |
| Gm6166         | 99.32462 | 257.856  | 1.376342 | 0.004851 |
| Gm9696         | 27.4077  | 108.9083 | 1.990461 | 0.005086 |
| Arntl          | 305.0999 | 879.924  | 1.528097 | 0.005428 |
| Nyx            | 33.36085 | 85.35407 | 1.355304 | 0.005465 |
| Maff           | 459.654  | 1211.674 | 1.398381 | 0.006246 |
| Hist1h1e       | 39.63882 | 95.01573 | 1.261252 | 0.006626 |
| Itih4          | 245.0419 | 655.0236 | 1.418518 | 0.006829 |
| Ntm            | 134.5001 | 67.09164 | -1.0034  | 0.006887 |
| Aldh1l2        | 85.15763 | 2160.658 | 4.665191 | 0.006976 |
| Cxcr5          | 93.08093 | 40.42815 | -1.20313 | 0.008725 |
| 3110082D06Rik  | 89.13767 | 37.99187 | -1.23034 | 0.009357 |
| Enc1           | 2854.271 | 6756.207 | 1.243091 | 0.009508 |
| Igkv12-89      | 136.4073 | 24.74897 | -2.46248 | 0.009802 |
| Gm15344        | 1353.006 | 4074.782 | 1.590555 | 0.010613 |
| Fam57b         | 847.8409 | 1753.975 | 1.048763 | 0.011415 |
| Akr1b3         | 3997.102 | 11631.87 | 1.541056 | 0.01177  |
| Cplx1          | 38.75057 | 10.64135 | -1.86454 | 0.01177  |
| Ttll8          | 55.96733 | 125.518  | 1.165237 | 0.013255 |
| Bdkrb2         | 17.33993 | 52.912   | 1.609497 | 0.013506 |
| Fbxo2          | 40.42468 | 93.35211 | 1.207446 | 0.013506 |
| RP24-318I5.1.1 | 5.976722 | 29.86403 | 2.320983 | 0.014447 |
| Serpina3d-ps   | 1.007351 | 22.68729 | 4.493246 | 0.014504 |
| Rgs1           | 108.5001 | 51.30636 | -1.08049 | 0.014739 |
| Serpina3i      | 65.24384 | 24.79982 | -1.39551 | 0.014906 |
| Myl7           | 19.79154 | 2.20909  | -3.16336 | 0.015362 |

|                 |          |          |          |          |
|-----------------|----------|----------|----------|----------|
| Gm6733          | 55.3216  | 112.3261 | 1.021778 | 0.016267 |
| Sh2d4b          | 251.3398 | 115.0922 | -1.12685 | 0.017185 |
| Eef1a2          | 2.874076 | 37.53648 | 3.707123 | 0.01796  |
| Gm14556         | 118.9822 | 48.4361  | -1.29659 | 0.018845 |
| Gm13502         | 42.90059 | 95.33395 | 1.151992 | 0.019728 |
| Col7a1          | 99.58645 | 226.2889 | 1.184144 | 0.020252 |
| Mreg            | 119.5357 | 449.4664 | 1.910772 | 0.020536 |
| B230216G23Rik   | 24.81263 | 64.12508 | 1.369814 | 0.020617 |
| Gm15856         | 11.39337 | 40.07078 | 1.814357 | 0.022062 |
| Gtse1           | 45.67183 | 97.56973 | 1.095129 | 0.022275 |
| Gm17597         | 71.16482 | 30.97589 | -1.20002 | 0.022687 |
| RP24-386J17.2.1 | 15.65468 | 63.02111 | 2.009241 | 0.02439  |
| Retnlg          | 8.479998 | 34.1943  | 2.01162  | 0.024603 |
| 1810014B01Rik   | 5551.601 | 16876.75 | 1.604061 | 0.024603 |
| Fcrla           | 82.52789 | 29.70168 | -1.47434 | 0.025458 |
| Cyb5r1          | 2175.521 | 5489.148 | 1.335221 | 0.027079 |
| Hist1h4i        | 24.45293 | 63.13629 | 1.368462 | 0.027132 |
| Derl3           | 70.21238 | 1765.925 | 4.652555 | 0.032355 |
| Hsp90b1         | 31603.53 | 97301.74 | 1.62238  | 0.032998 |
| Sirpb1a         | 7.887257 | 39.38876 | 2.320189 | 0.034902 |
| Srxn1           | 1660.623 | 7990.522 | 2.266565 | 0.036489 |
| Klk1b24         | 43.51623 | 13.85703 | -1.65094 | 0.037057 |
| Gm6096          | 67.4905  | 30.03872 | -1.16786 | 0.0375   |
| A030009H04Rik   | 47.07268 | 94.93913 | 1.012113 | 0.03769  |
| Glrx            | 682.8859 | 1774.89  | 1.378013 | 0.038903 |
| Cd79a           | 232.1789 | 115.9737 | -1.00144 | 0.039157 |
| Serpina3j       | 153.1334 | 69.23646 | -1.14519 | 0.039436 |
| Pou2af1         | 183.8554 | 86.2182  | -1.09251 | 0.040551 |
| Gm11728         | 14.68205 | 42.21903 | 1.52384  | 0.04064  |
| 3830408C21Rik   | 64.42057 | 27.60034 | -1.22284 | 0.042324 |
| Defb42          | 10.06113 | 423.3956 | 5.395141 | 0.04326  |
| Pik3c2g         | 1.805138 | 16.65558 | 3.205825 | 0.044453 |
| Ldlr            | 1296.467 | 2898.598 | 1.16077  | 0.046184 |
| Igkj2           | 80.53676 | 31.41838 | -1.35804 | 0.0466   |
| Rasef           | 1.034215 | 45.23753 | 5.450911 | 0.047794 |

**Supplementary Table 2. Primer sequences for RT-PCR**

| Gene name      |    | Primer sequence          | Gene name       |    | Primer sequence        |
|----------------|----|--------------------------|-----------------|----|------------------------|
| 36B4           | 5F | CGCTTTCTGGAGGGTGTCCGC    | Ldlr            | 5F | AGGCTGTGGGCTCCATAGG    |
|                | 3R | TGCCAGGACGCGCTTGTACC     |                 | 3R | TGCGGTCCAGGGTCATCT     |
| Adrb3          | 5F | CAGTCCCTGCCTATGTTTG      | Leptin          | 5F | CCTCATCAAGACCATTGTAC   |
|                | 3R | TTCTGGATTCTGCTCT         |                 | 3R | TCTCCAGGTCATTGGCTATCTG |
| Ap2            | 5F | AGCCCAACATGATCATCAGC     | Lipin1 $\beta$  | 5F | CAGCCTGGTAGATTGCCAGA   |
|                | 3R | TCGACTTTCCATCCCCTTC      |                 | 3R | GCAGCCTGTGGCAATTCA     |
| Agpat2         | 5F | GCCAAGGTCGGTCTCTACTG     | Mrc1            | 5F | TGATTACGAGCAGTGGAAGC   |
|                | 3R | GAACGAACCAGCTGATGATG     |                 | 3R | GTTACCCTAAGCCCAATTT    |
| Arg1           | 5F | AGACCACAGTCTGGCAGTTG     | Pdk4            | 5F | CTCCTTCGGTGCAGCTGG     |
|                | 3R | CCACCCAAATGACACATAGG     |                 | 3R | GTCCACTGTGCAGGTGTCT    |
| Bscl2          | 5F | GCTCTTCTGCACCATCCTTC     | Pla2g2e         | 5F | CTGGAGAAGCTGGGCTGT     |
|                | 3R | CGGTGGAGGAATCACAGTC      |                 | 3R | TGCGGTTGTAAGTGTTCAGG   |
| Ccl2           | 5F | CAGCAAGATGATCCCAATGA     | Plin2           | 5F | TCCACTGTCCACCTGATTGA   |
|                | 3R | TGTCTGGACCCATTCCTTCT     |                 | 3R | TGGCATGTAGTCTGGAGCTG   |
| C/EBP $\beta$  | 5F | CAAGCTGAGCGACGAGTACA     | Plin1           | 5F | CACCTGCGGCTGTGCTGG     |
|                | 3R | CAGCTGCTCCACCTTCTTCT     |                 | 3R | CGATGTCTCGGAATTCGCT    |
| C/EBP $\alpha$ | 5F | GAACAGCAACGAGTACCGGGTA   | PGC1 $\alpha$   | 5F | CCCTGCCATTGTAAAGACC    |
|                | 3R | GCCATGGCCTTGACCAAGGAG    |                 | 3R | TGCTGCTGTTCTGTTTTT     |
| COX8b          | 5F | GAACCATGAAGCCAACGACT     | PPAR $\alpha$   | 5F | CCACGAAGCCTACCTGAAGA   |
|                | 3R | GCGAAGTTCACAGTGGTTCC     |                 | 3R | ACTGGCAGCAGTGGAAGAAT   |
| Cpt1 $\beta$   | 5F | TTGCCCTACAGCTGGCTCATTTCC | PPAR $\gamma$ 2 | 5F | TCTCCTGTTGACCCAGAGCA   |
|                | 3R | GCACCCAGATGATTGGGATACTGT |                 | 3R | GTGGAGCAGAAATGCTGGAG   |
| Dgat2          | 5F | TCCAGCTGGTGAAGACACAC     | Prdm16          | 5F | CAGCACGGTGAAGCCATTC    |
|                | 3R | GATGCCTCCAGACATCAGGT     |                 | 3R | GCGTGCATCCGCTTGTG      |
| F4/80          | 5F | CTTTGGCTATGGGCTTCCAGTC   | Pref1           | 5F | CAAGGATGGCTGGGACGG     |
|                | 3R | GCAAGGAGGACAGAGTTTATCGTG |                 | 3R | CCTCCGTGCTGGCAGGG      |
| Fabp3          | 5F | GAAGAACGGGGATACTATCA     | Ppia            | 5F | CTGTTTGCAGACAAAGTTCCA  |
|                | 3R | CAACTAGCTCCCTAGTTAGT     |                 | 3R | AGGATGAAGTTCTCATCCTCA  |
| Fdps           | 5F | CAGTGGGCTGGTGTGTAGAA     | TNF $\alpha$    | 5F | TGCCTATGTCTCAGCCTCTTC  |
|                | 3R | AGAAGCAGAGCGTCGTTGAT     |                 | 3R | CTTTGCCTCACTCAGGATTGG  |
| Fgf21          | 5F | GCTCTCTATGGATCGCCTCAC    | Ucp1            | 5F | ACTGCCACACCTCCAGTCATT  |
|                | 3R | GGTACACATTGTAACCGTCCTC   |                 | 3R | CTTTGCCTCACTCAGGATTGG  |
| Gpat           | 5F | CAACACCATCCCCGACATC      | TNF $\alpha$    | 5F | TGCCTATGTCTCAGCCTCTTC  |
|                | 3R | GTGACCTTCGATTATGCGATCA   |                 | 3R | CTTTGCCTCACTCAGGATTGG  |
| Gyk            | 5F | ATCCGCTGGCTAAGAGACAA     | Ucp1            | 5F | ACTGCCACACCTCCAGTCATT  |
|                | 3R | AGGCGCATATAACCCTGAAA     |                 | 3R | CTTTGCCTCACTCAGGATTGG  |
| IL-1 $\beta$   | 5F | GGGCCTCAAAGGAAAGAATC     | Ucp2            | 5F | CGACTCTGTCAAACAGTTCTA  |
|                | 3R | CTCTGCTTGTGAGGTGCTGA     |                 | 3R | CAATGGTCTTGTAGGCTTCG   |
| Lcad           | 5F | AGCCTCCGTGGAGTTGCACA     | Ucp3            | 5F | TACAGAACCATCGCCAGGGA   |
|                | 3R | CCAGGAACTACGTGAAGCAAAG   |                 | 3R | GTGGCACAGAAGCCAGCT     |

## Supplementary Materials and Methods

**Triglyceride clearance test** Mice were fasted for 4 h, then injected by gavage 15  $\mu\text{l g}^{-1}$  body-weight of 20% intralipid (Sigma Aldrich) as described (1). Blood was collected at timed intervals then assayed for TG levels (Infinity; Thermo Fisher Scientific).

**Glycerol induced TG synthesis ~~with-in~~ isolated adipocytes** This assay was adapted from published protocols (2,3). Isolated adipocytes were washed twice with KRBB 2% BSA 5.5 mM glucose wash buffer at 37°C. 100  $\mu\text{l}$  packed adipocytes were incubated in 450  $\mu\text{l}$  1x KRBB with 2% FFA free BSA, 5.5 mM glucose, 100  $\mu\text{M}$  cold glycerol with 12.5  $\mu\text{Ci}$  radiolabeled [ $^3\text{H}$ ]-glycerol /reaction at 37 °C for 2 h. 500  $\mu\text{l}$  methanol ~~and 500 methonal werewas~~ then added ~~and~~; vigorously mixed to extract lipids according to Bligh and Dyer (4). Equal amounts of lipids determined by Triglyceride Reagent (Therma Fisher) were separated by thin-layer chromatography as previously described (5). TG spots were scraped and counted by scintillation counting.

**Catecholamine assay** Plasma epinephrine and norepinephrine ~~are-were~~ measured by HPLC via ~~an~~ electrochemical detection. Plasma ~~was~~ absorbed onto alumina at a ~~ph-pH~~ of 8.6, eluted with dilute perchloric acid, and auto-injected onto a c18 reversed-phase column. An internal standard (dehydroxylbenzylamine; DHBA) ~~was~~ included with each extraction to monitor recovery and standard curves for both epinephrine and norepinephrine ~~are-run~~. Results ~~are-were~~ quantitated through a chromatography data station (6,7).

## Supplementary References

1. Kusminski, C. M., Holland, W. L., Sun, K., Park, J., Spurgin, S. B., Lin, Y., Askew, G. R., Simcox, J. A., McClain, D. A., Li, C., and Scherer, P. E. (2012) MitoNEET-driven alterations in adipocyte mitochondrial activity reveal a crucial adaptive process that preserves insulin sensitivity in obesity. *Nature medicine* **18**, 1539-1549

2. Guan, H. P., Li, Y., Jensen, M. V., Newgard, C. B., Steppan, C. M., and Lazar, M. A. (2002) A futile metabolic cycle activated in adipocytes by antidiabetic agents. *Nature medicine* **8**, 1122-1128
3. Ruan, H., and Pownall, H. J. (2001) Overexpression of 1-acyl-glycerol-3-phosphate acyltransferase- $\alpha$  enhances lipid storage in cellular models of adipose tissue and skeletal muscle. *Diabetes* **50**, 233-240
4. Bligh, E. G., and Dyer, W. J. (1959) A rapid method of total lipid extraction and purification. *Can J Biochem Physiol* **37**, 911-917
5. Chen, W., Chang, B., Wu, X., Li, L., Sleeman, M., and Chan, L. (2013) Inactivation of Plin4 downregulates Plin5 and reduces cardiac lipid accumulation in mice. *American journal of physiology. Endocrinology and metabolism* **304**, E770-779
6. Anton, A. H., and Sayre, D. F. (1962) A study of the factors affecting the aluminum oxide-trihydroxyindole procedure for the analysis of catecholamines. *The Journal of pharmacology and experimental therapeutics* **138**, 360-375
7. Goldstein, D. S., Feuerstein, G., Izzo, J. L., Jr., Kopin, I. J., and Keiser, H. R. (1981) Validity and reliability of liquid chromatography with electrochemical detection for measuring plasma levels of norepinephrine and epinephrine in man. *Life sciences* **28**, 467-475
